# Supplementary material for: Incidence and Prognostic Nomogram for Resected Non-small Cell Neuroendocrine Tumor: A Population-Based Respective Study in China and the SEER Database
Source: Research Square preprint supplement (doi:10.21203/rs.3.rs-1116500/v1), 2021-12-20
Supplement: Supplementary file 1 [file eeb3fcf3356fe3fef944a543.docx]

**Supplement figure 1.** **The interface of the online server of the nomogram.**
